# Supplementary material for: Media screen time use and mental health in school aged children during the pandemic
Source: Research Square preprint supplement (doi:10.21203/rs.3.rs-1700834/v2), 2023-02-13
Supplement: Supplementary file 1 [file 7bb1d54aea992f7480c5b756.docx]

Table 2 GEE regression model for children’s internalizing behaviours

|  |  |  | | **Model 1** | | | |  | | |  | | |  | | |  | | | **Model 2** | | | | |  | | |  | |  | | | | |  | | |  | **Model 3** | | |  | | |  | | | | | |
| --- | --- | --- | --- | --- | --- | --- | --- | --- | --- | --- | --- | --- | --- | --- | --- | --- | --- | --- | --- | --- | --- | --- | --- | --- | --- | --- | --- | --- | --- | --- | --- | --- | --- | --- | --- | --- | --- | --- | --- | --- | --- | --- | --- | --- | --- | --- | --- | --- | --- | --- |
|  | *B* | *SE* | | 95% CI | | | | *p* | | |  | | | *B* | | | *SE* | | | 95% | | | | CI | | | | *p* | |  | | | *B* | | | | | *SE* | 95% | | | | CI | | | | | *p* | |
| *LL* | | *UL* | | |  | | |  | | |  | | |  | | | *LL* | | *UL* | | | |  | | | |  | | |  | | |  | | | | *LL* | | | *UL* | | |  | | | |
| Parent gender a | -.590 | .55 | -1.67 | | .487 | | .283 | | |  | | | -.577 | | | .468 | | | -1.49 | | | .340 | | | | .218 | | |  | | | -.548 | | | | 5.30 | | | | -1.59 | | .490 | | | | .301 | | |
| Special needsb | -1.94 | 1.00 | -3.89 | | .015 | | .052 | | |  | | | -2.24 | | | .810 | | | -3.82 | | | -.648 | | | | .006***** | | |  | | | -2.06 | | | | .931 | | | | -3.89 | | -.237 | | | | .027***** | | |
| Income | .002 | .007 | -.011 | | .015 | | .738 | | |  | | | .000 | | | .006 | | | -.011 | | | .012 | | | | .959 | | |  | | | .002 | | | | .006 | | | | -.011 | | .014 | | | | .768 | | |
| Children at home | .450 | .265 | -.069 | | .970 | | .089 | | |  | | | .479 | | | .202 | | | .084 | | | .875 | | | | .017***** | | |  | | | .508 | | | | .245 | | | | .028 | | .988 | | | | .038***** | | |
| Child age | -.255 | .115 | -.481 | | -.029 | | .027***** | | |  | | | -.172 | | | .100 | | | -.361 | | | .017 | | | | .075 | | |  | | | -.265 | | | | 1.06 | | | | -.472 | | -.059 | | | | .012***** | | |
| Physical activity | -.008 | .002 | -.012 | | -.003 | | .001** | | |  | | | -.006 | | | .002 | | | -.010 | | | -.002 | | | | .007* | | |  | | | -.007 | | | | .002 | | | | -.012 | | -.003 | | | | .001****** | | |
| Sleep | .001 | .004 | -.007 | | .009 | | .806 | | |  | | | .002 | | | .003 | | | -.005 | | | .009 | | | | .570 | | |  | | | .003 | | | | .004 | | | | -.005 | | .010 | | | | .482 | | |
| Screen time | .003 | .001 | .000 | | .006 | | .030***** | | |  | | | .002 | | | .001 | | | .000 | | | .005 | | | | .036* | | |  | | |  | | | |  | | | |  | |  | | | |  | | |
| PSIc |  |  |  | |  | |  | | |  | | | .068 | | | .010 | | | .048 | | | .088 | | | | .001****** | | |  | | |  | | | |  | | | |  | |  | | | |  | | |
| Parental Involvement |  |  |  | |  | |  | | |  | | | .086 | | | .041 | | | .006 | | | .116 | | | | .034***** | | |  | | | .007 | | | | .035 | | | | -.062 | | .076 | | | | .840 | | |
| PSI*Screen time |  |  |  | |  | |  | | |  | | |  | | |  | | |  | | |  | | | |  | | |  | | | <.001 | | | | 0.001 | | | | 0.00001 | | 0.001 | | | | .001****** | | |

a 0 = Female; 0 b = No developmental disorder; c Parent stress index. * p<.05, **p<.001. Model 1: A significant positive main effect was found for screen time and internalizing behaviours (p=.030). Model 2: Children’ screen time was further explored in an extended model including parent stress and parental involvement, which were both significantly associated with children’s internalizing behaviours (both, p<.05). Model: 3 An interaction model with screen time and parent stress were significantly associated with one another (p=.001).
